# Supplementary material for: Spring net community production and its coupling with the CO 2 dynamics in the surface water of the northern Gulf of Mexico
Source: Copernicus journal article supplement (doi:10.5194/bg-2019-88), 2019-03-25
Supplement: Supplementary file 1 [file bg-2019-88-supplement.pdf]

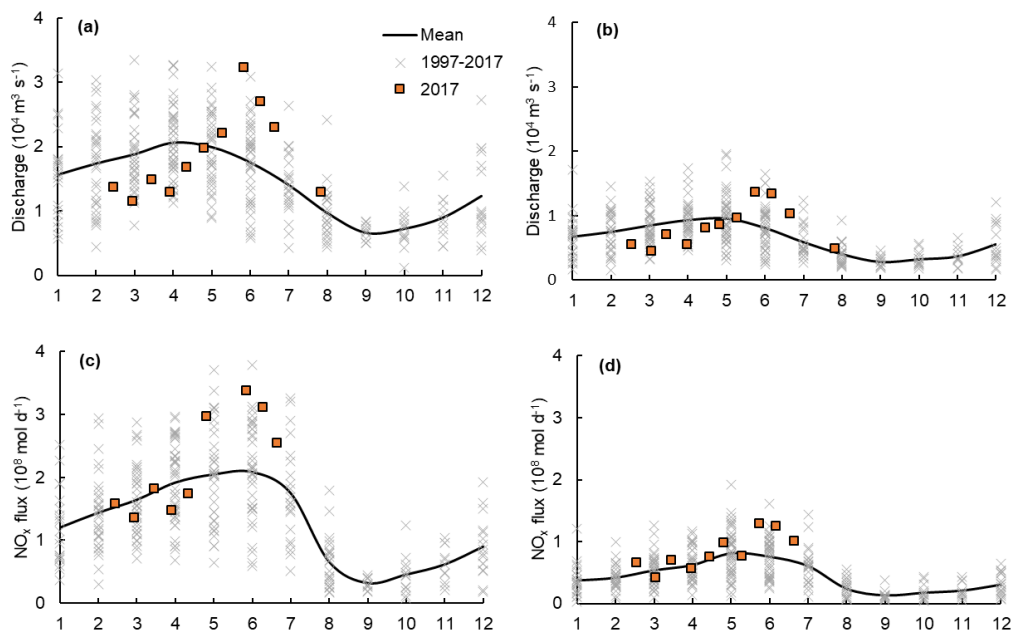

**Figure S1: (a, c) Freshwater discharge and  $\text{NO}_x$  flux of the Mississippi River and (b, d) Atchafalaya River. The measurements for the period of 1997-2017 (grey x) and the monthly mean values (grey lines) are shown and the 2017 data are highlighted as red dots.**

Data are from the USGS webpage (<http://waterdata.usgs.gov/nwis/qw>): station 07373420 Mississippi River at St. Francisville

5 (30°45'30" N, 91°23'45" W) and station 07381495 Atchafalaya River at Melville (30°41'26" N, 91°44'10" W).

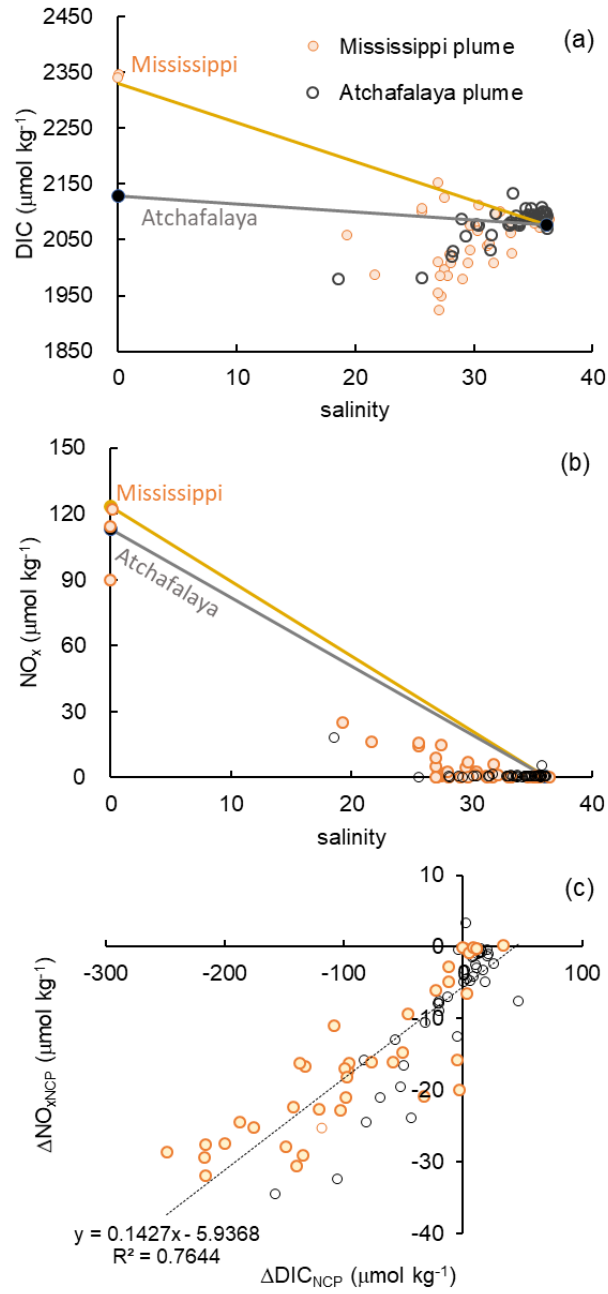

**Figure S2:** The scatter plots of (a) DIC and salinity, (b)  $\text{NO}_x$  and salinity and (c)  $\Delta\text{DIC}_{\text{biol}}$  and  $\Delta\text{NO}_{x,\text{biol}}$  in the Mississippi and Atchafalaya plume. The end member concentrations of the Mississippi river, the Atchafalaya river and gulf water are shown in panels a and b as well as the conservative mixing lines.
